# Supplementary material for: Loss of chaperone-mediated autophagy is associated with low vertebral cancellous bone mass
Source: PubMed Central journal article supplement (PMC8873216; doi:10.1038/s41598-022-07157-9), 2022-02-24

## Loss of chaperone-mediated autophagy is associated with low vertebral cancellous bone mass

Nisreen Akel<sup>1</sup>, Ryan S. MacLeod<sup>2,3</sup>, Stuart B. Berryhill<sup>5</sup>, Dominique J. Laster<sup>1</sup>, Milena Dimori<sup>1</sup>, Julie A. Crawford<sup>5</sup>, Qiang Fu<sup>2,4</sup> and Melda Onal<sup>1\*</sup>

<sup>1</sup>Department of Physiology and Cell Biology, University of Arkansas for Medical Sciences, Little Rock, AR, USA

<sup>2</sup>Center for Musculoskeletal Disease Research, University of Arkansas for Medical Sciences, Little Rock, AR, USA

<sup>3</sup>Division of Endocrinology, University of Arkansas for Medical Sciences, Little Rock, AR, USA

<sup>4</sup>Genetic Models Core Facility, University of Arkansas for Medical Sciences, Little Rock, AR, USA

<sup>5</sup>Bone Histology and Imaging Core, University of Arkansas for Medical Sciences, Little Rock, AR, USA

\* Corresponding Author

E-mail: [monal@uams.edu](mailto:monal@uams.edu) (MO)

## SUPPLEMENTARY FIGURE LEGENDS

**Supplementary Figure 1. Expression of *Lamp2* isoforms in different tissues.** Femur shafts, lumbar vertebrae 5 (L5), kidneys, and livers were isolated from the 18-week-old male (a-b) and female (c-f) wild type (WT) and LAMP2AC global knockout (L2ACgKO) mice. a-f, mRNA levels of *Lamp2* isoforms in these tissues were measured by quantitative real-time PCR (qRT-PCR) and normalized to  $\beta$ -actin. Bars indicate mean  $\pm$  STDEV, n= 6-10 mice per genotype. mRNA values of each isoform from WT and L2ACgKO groups were compared by Welch's *t*-test.

**Supplementary Figure 2. Determining the deletion in L2ACgKO mice.** Illustration of Chromosome X (Chr X): 38,401,341 -38,456,463 containing the *Lamp2* gene. Schematic of spliced mRNAs encoding the three *Lamp2* isoforms as designated by Ensembl genome browser (*Lamp2* ENSMUSG00000016534). Red arrows indicate the locations that the CRISPR-Cas9 sgRNAs target. Expanded view of the ChrX:38,391,630-38,405,790 region in wild-type mice and the sequencing result of the same region in L2ACgKO mice. Black bars represent DNA, gray boxes indicate exons, and small dashed lines indicate deleted/missing regions. The sequence of this locus in L2ACgKO after CRISPR-Cas9 genome editing is indicated below the illustration.

**Supplementary Figure 3. Gene expression analysis of bone formation and resorption marker genes in bones of L2ACgKO male mice.** qRT-PCR was used to measure mRNA levels of target genes in lumbar vertebrae 5 (L5) of 5-week-old male *Lamp2*AC global knock-out (L2ACgKO) mice and their littermate controls (wild-type mice, WT). a-d, mRNA levels of osteoblast marker gene *Bglap* encoding Osteocalcin (a), osteoclast marker genes *Cathepsin K (CtsK)* and *Trap (Acp5)* (b and c), *Tnfsf11* encoding pro-resorptive cytokine RANKL (d) and *Tnfrsf11b* encoding the decoy receptor of RANKL (e) were measured. Levels of target genes were normalized to the housekeeping gene  $\beta$ -actin. n= 8-12 mice/group. Bars indicate mean  $\pm$  STDEV. *p* values were calculated and evaluated by Welch's *t*-test; \*, *p*<0.05.

**Supplementary Figure 4. Biomechanical analysis of young adult L2ACgKO mice.** a-b, Biomechanical analysis was performed on femurs (a) and lumbar vertebrae 4 (L4) (b) of 18-week-old male L2ACgKO mice and their control littermates. Young's modulus, yield stress, and ultimate stress measurements were obtained from three-point bending test of femurs (a) or compression test of L4 (b). n= 8 mice/group. Bars indicate mean  $\pm$  STDEV. *p* values were calculated and evaluated by Welch's *t*-test; \*, *p*<0.05.

**Supplementary Figure 5. CMA-deficiency is associated with increased osteoclastogenesis.** Bone marrow was isolated from 4-month-old L2ACgKO and WT mice. a, For each in vitro osteoclastogenesis assay, bone marrow of 3 mice/genotype were pooled and plated in 6-well plates. a, Osteoclast number per well (OcN/well) was quantified in each experiment using 3-6 wells/genotype. Bars indicate mean  $\pm$  STDEV. *p* values were calculated and evaluated by Welch's *t*-test; \*, *p*<0.05. b, Representative images of TRAP-stained osteoclasts and their support cells are presented. In each image, osteoclasts are defined as TRAP-positive cells with three or more nuclei, and are indicated with stars (\*). In all images, white scale bars are 200 $\mu$ m.

**Supplementary Figure 6. CMA deficiency increases RANKL expression in calvarial osteoblasts.** a-c, *Lamp2a* was knocked down in osteoblastic UAMS-32 cells and plated into 6 well plates for gene expression analysis. d-f, Wild type calvarial osteoblasts were plated into 6 well plates and each well was stably transfected with scrambled shRNA (shRNA Con) or shRNA targeting LAMP2A (shRNA L2A). a-f,

qRT-PCR analysis of three *Lamp2* isoforms and *Tnfrsf11* (*Rankl*) in osteoblastic UAMS-32 cells (**a-c**) or calvarial osteoblasts (**d-e**) that stably express scrambled shRNA (shRNA Con) or shRNA targeting LAMP2A (shRNA L2A). mRNA levels of all transcripts were normalized to the housekeeping gene  $\beta$ -actin. n= 3 wells/group. Bars indicate mean  $\pm$  STDEV. *p* values were calculated and evaluated by student's *t*-test; \*,  $p < 0.05$ .

**Supplementary Figure 7. Macroautophagy and proteasomal degradation levels in L2ACgKO calvarial osteoblasts.** Calvarial osteoblasts were isolated from *Lamp2*AC global knock-out (L2ACgKO) mice and their control littermates (wild-type mice, WT). **a**, Original images of western blot analysis as shown in Fig. 7. **b**, Calvarial osteoblasts isolated from one mouse per genotype were plated in 6 well plates and cultured with vehicle (DMSO) or 50 $\mu$ M of proteasome inhibitor MG132 for 6 hours, and western blot analysis was performed. For this purpose, one membrane was incubated with antibodies against actin (red) and ubiquitin (green). Another membrane was incubated with antibodies against actin (red) and K48-linked ubiquitination (green). **c**, Calvarial osteoblasts isolated from a second set of WT and L2ACgKO mice were cultured with vehicle (DMSO) or 100 $\mu$ M Bafilomycin A (BafA) for 4 hours. LAMP2A, LC3, and p62 protein levels were determined by western blot analysis. LC3-II and p62 levels were quantified and normalized to actin levels. Original images of western blot membranes of this experiment are shown in **d**. For western blot analysis of macroautophagy in both experiments (**a** and **d**), one membrane was incubated with antibodies against actin (red) and LAMP2A (green). Another membrane containing the WT and L2ACgKO samples was cut into two at 25kDa. The top part of this membrane was incubated with antibodies against actin (red) and p62 (green). The bottom part of the same membrane was incubated with antibodies targeting LC3 (green). All membranes were incubated with appropriate secondary antibodies conjugated with IRDye 680 or IRDye 800 dyes (LI-COR), scanned, and analyzed as described in the method section.

WT L2ACgKO

### a. Male Liver

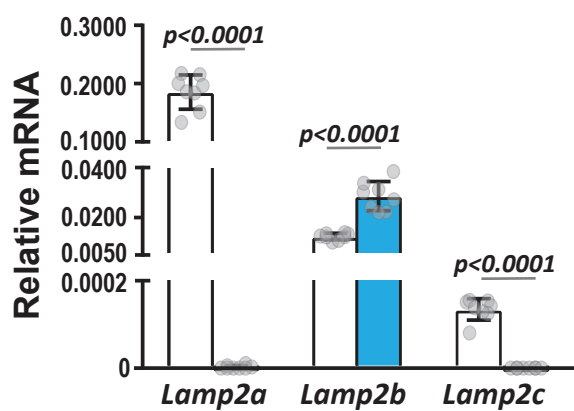

### b. Male Kidney

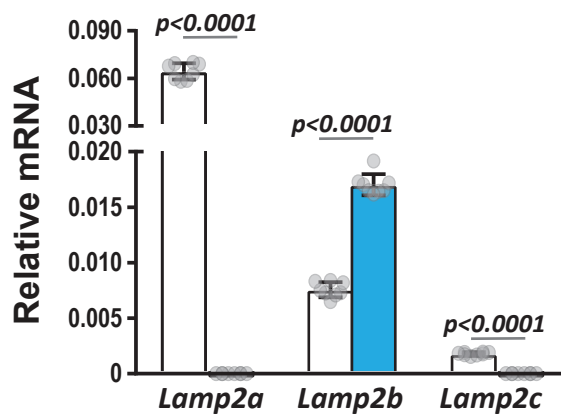

### c. Female Liver

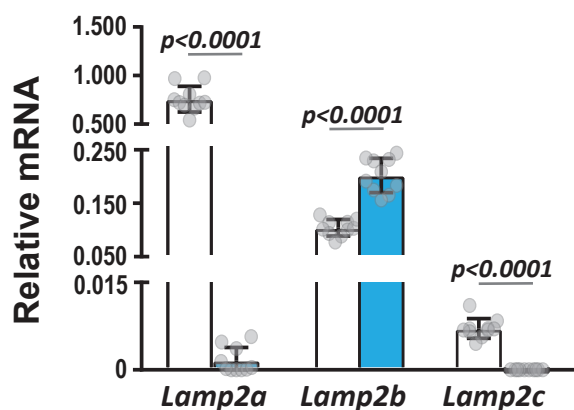

### d. Female Kidney

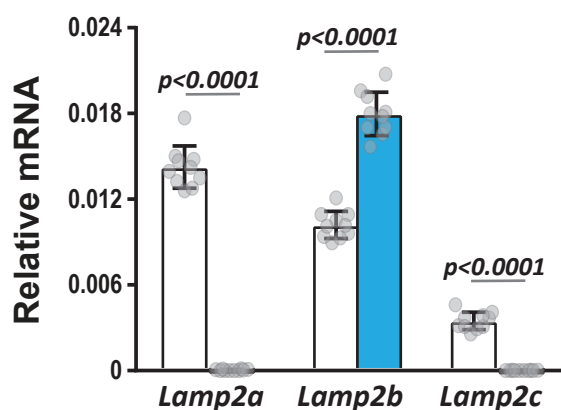

### e. Female L5

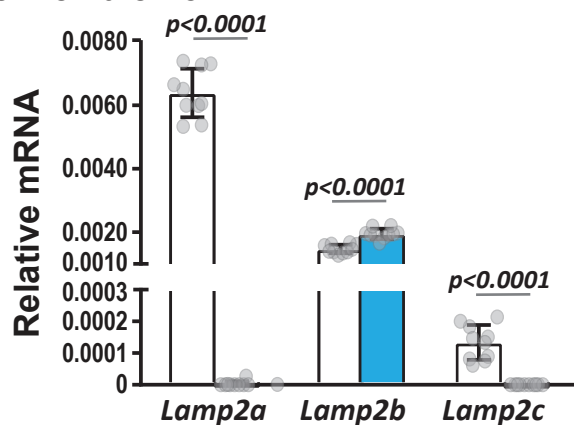

### f. Female Femur Shaft

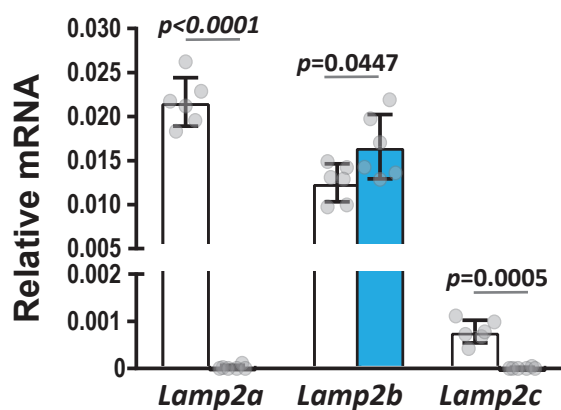



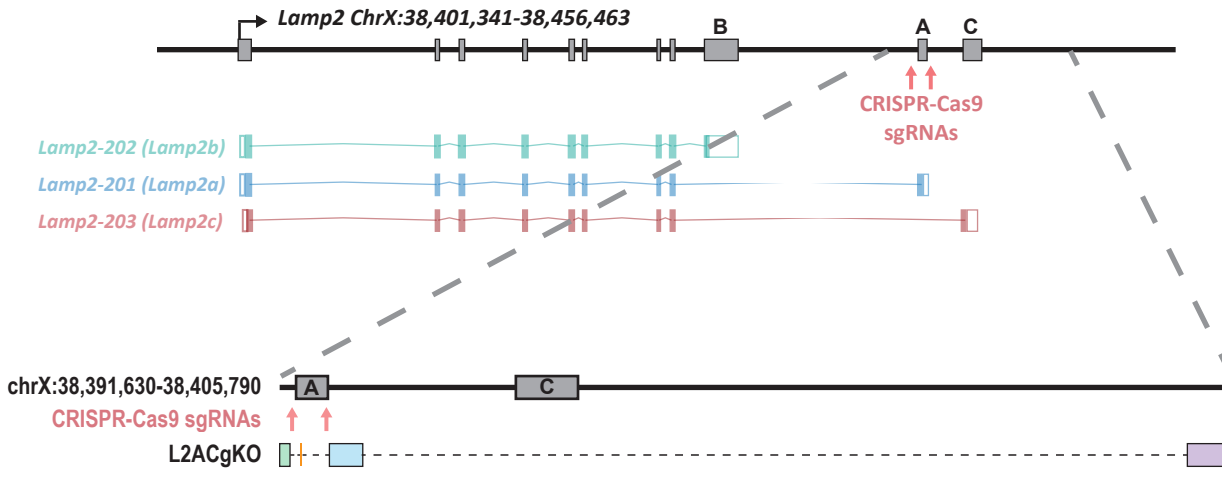

Sequence of L2ACgKO:

```

GCATTGAGCTCTGTGTCTGCTTTATATACGTGTTTATTTGGTGAGTTAGTACTCTCTAATATCGAGGATTCAATGTCA
TAGTTGGCTCTGGAAGCTCCAGGCTGATCAAGGGAAAGCAAATTTCTGTAAGAAGCCTGGGAGTGTGTGCTCACTATA
CACATTTTCCCCCAATGACTGCTTTTTATGAAGGGGAACTGCATAGAAGTACTTGTTTTTTTGTTTTTGGCTTGAAAAA
AAAAACCTTTGGTGCAACATCTCATGAAATATCATATCACTACTGATAATGAATGCCAATGACTTGCCATTTTGATGT
AAAAATCTGTATGCAGGGGTCAAGTGTCTGTTTCAATTTGTAACAGCTGTCCTAATTTAAACTCACCCTACTAGCT
TTTGCATATACTTAAAAATACCTATCAGATATTCACAGACTTGGTTTTTTGGAGGGATGAAGTAGAGAGTCCGTAGGGCC
ATCCACAGTTTGTTTTTTGTTTTTTGTTTTTTAAATAAGAAGTGAAGAGGAACCAGAGAGTGTGTGTGTGTGTGTGTGT
TTGAAACAGGGTTTCTCTGTGTAGCCCTTGTCTCGAAGTCACTCTTTAGACCAGGCTGGCCTTGAACTCACAGAGAT
CCACCTGCTTCTGCCTCCTGAATGCTGAAATTGAGGTGTGTGCTATCGCCACCCAGCTAAGTATTACATTTTTTAAAGG
TTATGACTTGATGTCTTTTGTAGTTCAAGTTAAATATGAAATTGATTCTCAAACCTTGTGATTTTTTTACATAGGTTAAA
AACAGGCTCAGAAAAGTTATAACAGAGCTCAGACTGGCTTCTTAGGTTGTTTTGTTTTGTTGTTATTTTTGAGACAGGGT
TTCTCTGTGTAACCTTTGGCTATCCTGGAACCTTGATCTGTAGACCAGGCTGGCCTCAAAGTTAGAGATTCACCTGCCTC
TTCTCATAAGTGTGGGATTAAGTCAATGCTCCACCACTGCCTGGCTAACATGTAGTGTGTGTGTGTGTGTGTGTGTGT
GTGTGTGTGTGTGTGTGAATTTATAGGGTTATTCTCTTCAATCAGTAGGGAAAAGAGTGGAACATTAATAATAATGCTT
AACTATTGAAACAGTAGTTTACTTATTTTTAGACCCCTGACTTCACAACATTAATAATAATAATAATAATAATAATAATA
GTTAAATTTAAACTACAGAAGATCCAGAATTGAACATAGATAGCTACAGTAGCACAGTAGTGGGGATGTTGTGGTAG
AAACACTTGCTTGGCATGCACAAGGCTGTGAAATAATCCACCCCCACGAGCACATACACAGAGTGAAAAATGATAG
TGAAAAAGAAGATATTTCAATATTTAAATAATGTACTATTTCTGAGCANNTAAGTGACACCAGACACAAAAGTTNAACAA
    
```

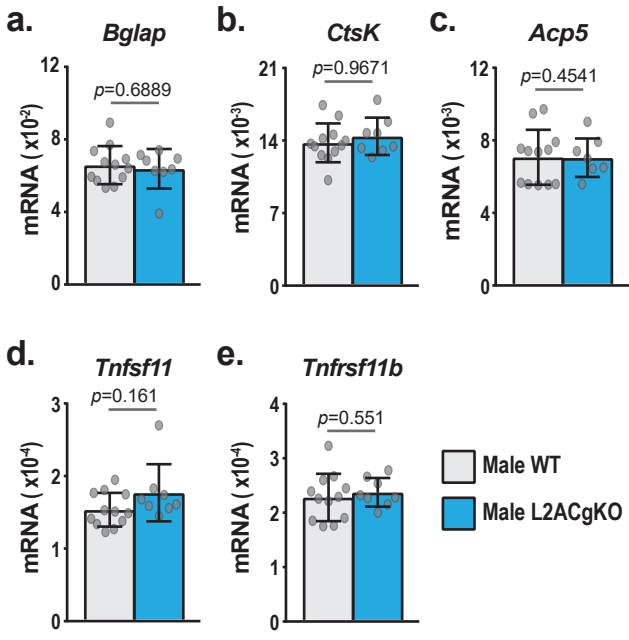

Male WT Male L2ACgKO

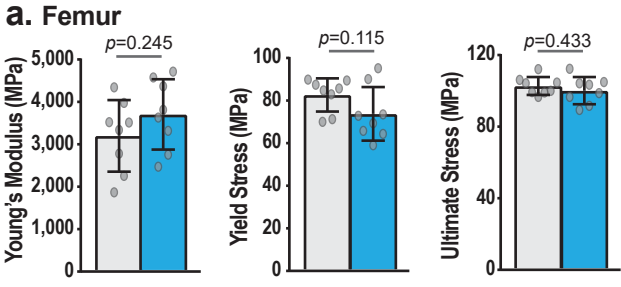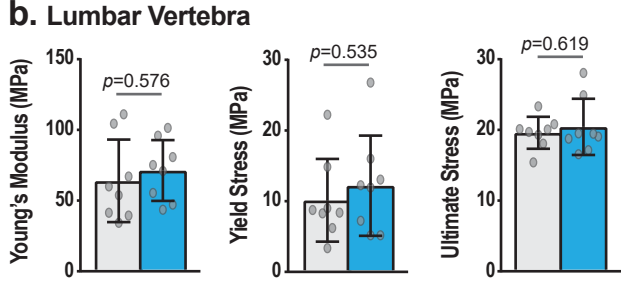

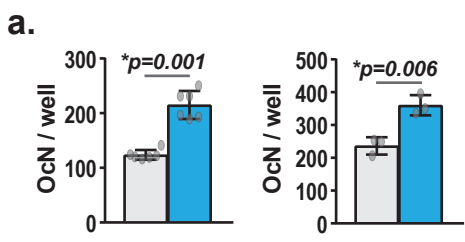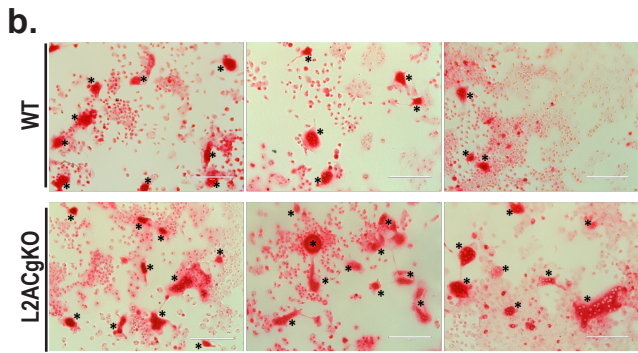

□ shRNA Con      ■ shRNA L2A

### UAMS-32 osteoblastic cell line

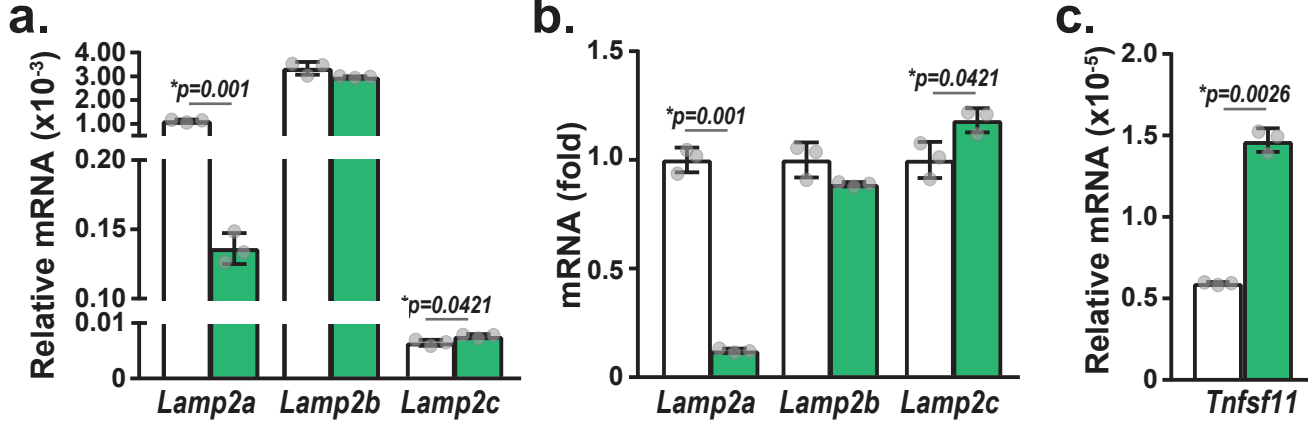

### Calvarial Osteoblasts

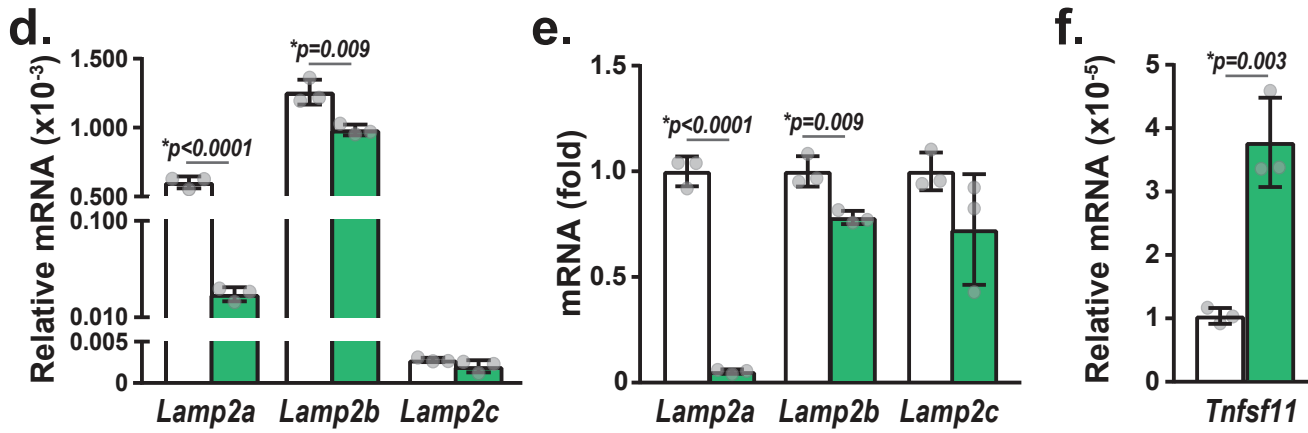

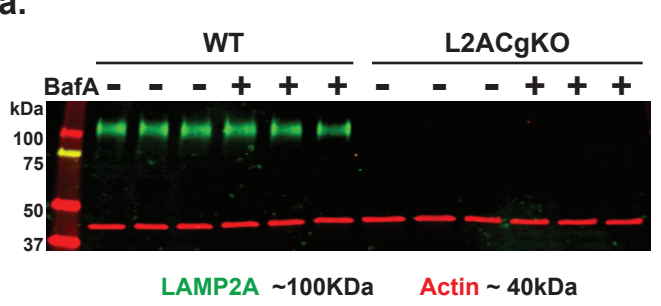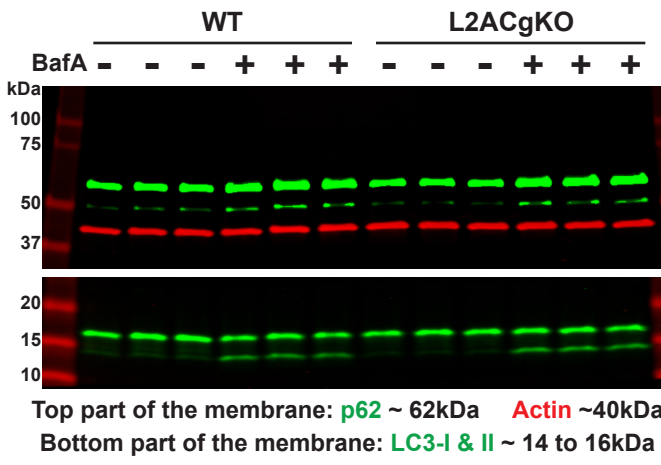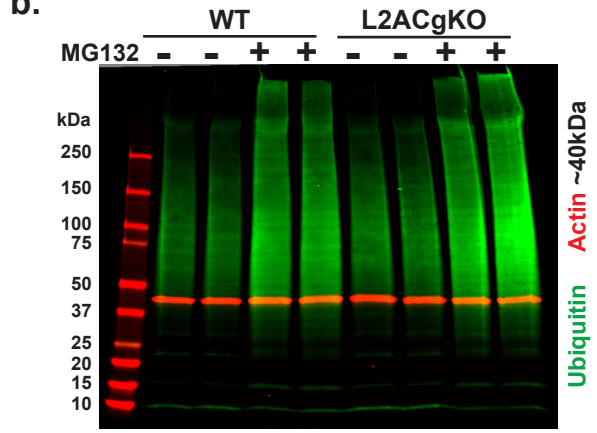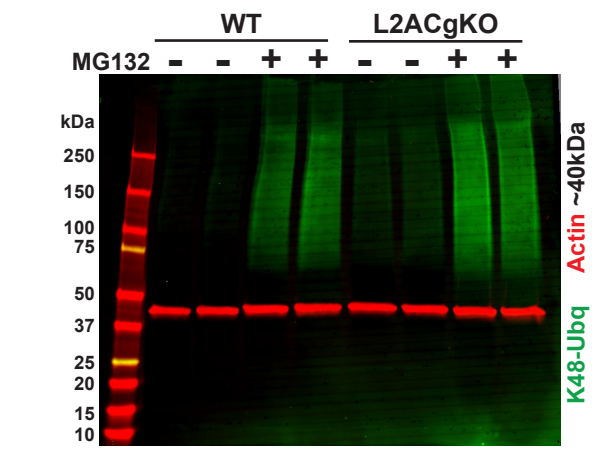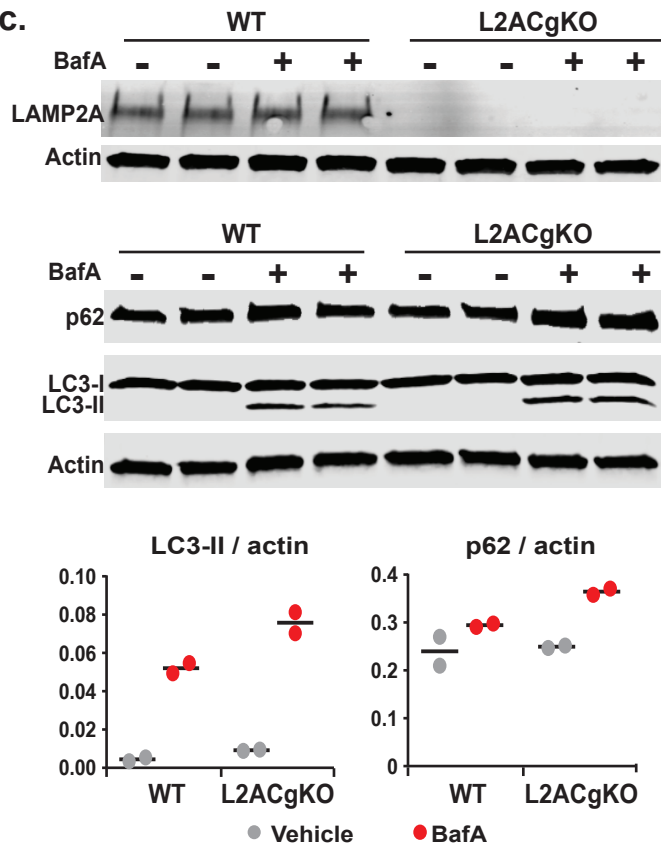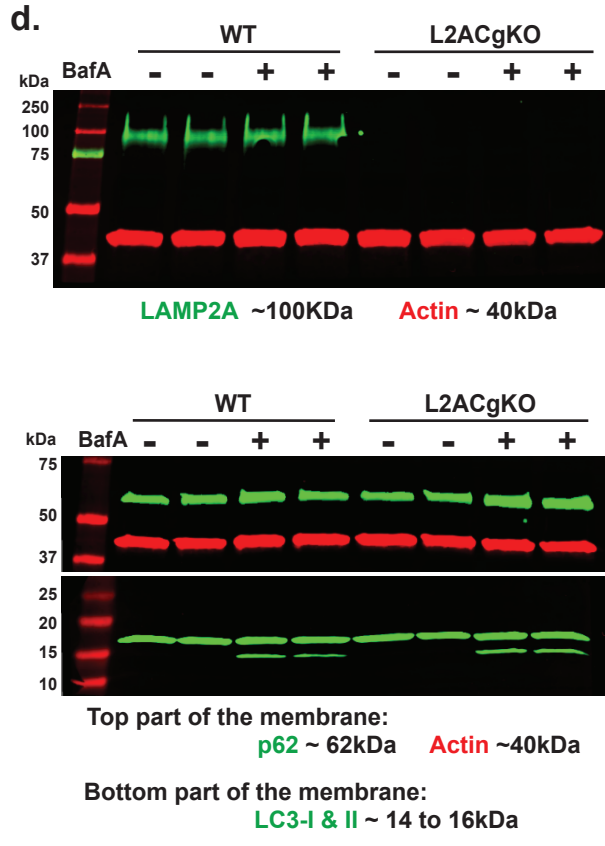

Supplement: 41598_2022_7157_MOESM1_ESM.pdf [file 41598_2022_7157_MOESM1_ESM.pdf]
